# Supplementary material
Source: PubMed Central journal article supplement (PMC5340690)
Supplement: ajtr0009-0558-f6.pdf [file ajtr0009-0558-f6.pdf]

## Intracoronary hypothermia in AMI

**Supplementary Table 1.** Temperature of the coronary blood and the infarct area (proximal, mid and distal) measured during the occlusion (200 seconds) and reperfusion phases (600 seconds)

|       | Blood | Proximal | Mid   | Distal |
|-------|-------|----------|-------|--------|
| Exp1  | 26.13 | 35.02    | 36.25 | 36.77  |
| Δ%    | -     | -        | -     | -      |
| Exp2a | 25.45 | 30.19    | 32.36 | 34.17  |
| Exp2b | 25.72 | 30.58    | 32.39 | 34.45  |
| Δ%    | -1.1  | -1.3     | -0.1  | -0.8   |
| Exp3a | 26.91 | 30.76    | 30.54 | 31.83  |
| Exp3b | 25.87 | 29.64    | 29.21 | 30.18  |
| Δ%    | 3.9   | 3.6      | 4.4   | 5.2    |
| Exp4a | 28.23 | 33.03    | 33.59 | 33.62  |
| Exp4b | 26.6  | 32.43    | 33.33 | 33.36  |
| Δ%    | 5.8   | 1.8      | 0.8   | 0.8    |
| Exp5a | 25.97 | 36.92    | 35.43 | 30.32  |
| Exp5b | 25.23 | 37.02    | 35.94 | 30.55  |
| Δ%    | 2.8   | -0.3     | -1.4  | -0.8   |

Temperatures measured at 200 seconds from the start of the protocol.

|        | Blood | Proximal | Mid   | Distal |
|--------|-------|----------|-------|--------|
| Exp1   | 33.73 | 33.45    | 33.7  | 33.73  |
| Δ%     | -     | -        | -     | -      |
| Exp2a  | 33.9  | 33.72    | 33.73 | 34     |
| Exp2b  | 33.02 | 33.82    | 33.65 | 34.13  |
| Δ%     | 2.6   | -0.3     | 0.2   | -0.4   |
| Exp3aa | 33.88 | 33.61    | 33.44 | 33.56  |
| Exp3b  | 33.71 | 34.15    | 34.17 | 34.01  |
| Δ%     | 0.5   | -1.6     | -2.2  | -1.3   |
| Exp4a  | 28.33 | 30.19    | 30.9  | 31.09  |
| Exp4b  | 31.75 | 33.46    | 33.9  | 34.32  |
| Δ%     | -12.1 | -10.8    | -9.7  | -10.4  |
| Exp5a  | 29.9  | 37.62    | 36.73 | 31.99  |
| Exp5b  | 29.91 | 37.57    | 36.72 | 31.48  |
| Δ%     | -0.03 | 0.1      | 0.03  | 1.6    |

Temperatures measured at 600 seconds from the start of the protocol. Repeatability is expressed as the relative difference between two consecutive measurements (delta%). In the first heart no repeatability experiment was performed.

**Supplementary Video.** Infrared camera recordings showing excellent delineation of the infarct area. There is no myocardial temperature decrease observed outside the infarct area.
